# Supplementary material for: Inferring epidemiological links from deep sequencing data: a statistical learning approach for human, animal and plant diseases
Source: PubMed Central journal article supplement (PMC6553606; doi:10.1098/rstb.2018.0258), 2019-05-06
Supplement: rstb20180258supp1.pdf [file rstb20180258supp1.pdf]

# Electronic supplementary material

## Inferring epidemiological links from deep sequencing data: a statistical learning approach for human, animal and plant diseases

Alamil M., Hughes J., Berthier K., Desbiez C., Thébaud G. and Soubeyrand S.

March 18, 2019

Table S1: Statistics about data corresponding to the three case studies, namely Influenza in pigs, Ebola in humans and a potyvirus in salsifies.

| Statistics                                           | Influenza   |                  | Ebola                      | Potyvirus  |
|------------------------------------------------------|-------------|------------------|----------------------------|------------|
|                                                      | Naive chain | Vaccinated chain |                            |            |
| Number of host units                                 | 10          | 13               | 58                         | 27         |
| Number of sequence fragments                         | 1           | 1                | 31                         | 1          |
| Fragment length <sup>°</sup>                         | 939         | 939              | 885 <sup>†</sup>           | 438        |
| Mean (SD) sequencing depth                           | 41.3 (16.2) | 58.3 (14.8)      | 14300 (17200) <sup>†</sup> | 1550 (930) |
| Number of different variants                         | 331         | 623              | 16.1 <sup>†</sup>          | 278        |
| Mean (SD) number of different variants per host unit | 18.6 (7.0)  | 26.1 (9.4)       | 1.37 (0.64) <sup>†</sup>   | 10.3 (7.6) |
| Mean (SD) distance b/n variants*                     | 3.31        | 3.61 (1.34)      | 2.42 (1.01) <sup>†</sup>   | 25.9 (6.6) |
| Mean (SD) within-host distance b/n variants*         | 1.17        | 2.80 (1.00)      | 1.37 (0.56) <sup>†</sup>   | 23.6 (3.4) |

<sup>°</sup> Obtained after the removal of sites with missing values.

<sup>†</sup> Average over the 31 available sequence fragments.

\* The (genetic) distance between (b/n) two sequence fragments is the number of different nucleotides.

Table S2: Contact information used for the reconstruction of transmission chains of Influenza in pigs and Ebola in humans. Note that host 401 was alone in group 3 of the vaccinated chain.

| Outbreak                            | Contact information           | Training host | Contact       |
|-------------------------------------|-------------------------------|---------------|---------------|
| Swine influenza<br>Naive chain      | For 2 hosts in the last group | 106           | 105, 108, 112 |
|                                     |                               | 112           | 105, 108, 106 |
|                                     | For 2 hosts in groups 3 and 4 | 111           | 104, 116, 109 |
|                                     |                               | 108           | 109, 111, 105 |
| Swine influenza<br>Vaccinated chain | For 2 hosts in the last group | 400           | 412, 414, 413 |
|                                     |                               | 413           | 412, 414, 400 |
|                                     | For 2 hosts in groups 3 and 4 | 401           | 409, 417      |
|                                     |                               | 416           | 401,415       |
| Ebola                               | For 5 hosts among 58          | G3817         | G3729         |
|                                     |                               | G3820         | G3729         |
|                                     |                               | G3821         | G3729         |
|                                     |                               | G3823         | G3729         |
|                                     |                               | G3851         | G3752         |

Table S3: Mean difference between each sequence fragment of each training host and the closest sequence fragment in its source identified by contact tracing. The last two lines give, for each host, the average and the standard deviation of the mean difference over all sequence fragments. Figures lower than 0.0005 are denoted by 0 to facilitate the identification of significant positive values.

| Fragment    | G3817 | G3820 | G3821 | G3823 | G3851 |
|-------------|-------|-------|-------|-------|-------|
| 500-1500    | 0     | 0     | 0.020 | 0     | 0.031 |
| 1000-2000   | 0     | 0.012 | 0     | 0     | 0     |
| 1500-2500   | 0     | 0     | 0     | 0     | 0     |
| 2000-3000   | 0     | 0.002 | 0     | 0     | 0     |
| 2500-3500   | 0.009 | 0     | 0.024 | 0.020 | 0.013 |
| 3000-4000   | 0     | 0     | 0     | 0     | 0     |
| 3500-4500   | 0.002 | 0     | 0.074 | 0     | 0.012 |
| 4000-5000   | 0     | 0     | 1.081 | 0     | 0     |
| 4500-5500   | 0     | 0     | 0.029 | 0     | 0.014 |
| 5000-6000   | 0     | 0.018 | 0     | 0     | 0     |
| 5500-6500   | 0     | 0     | 0     | 0     | 0     |
| 6000-7000   | 0     | 0     | 0.011 | 0     | 0     |
| 6500-7500   | 0     | 0     | 0     | 0     | 0     |
| 7000-8000   | 0     | 0.005 | 0     | 0     | 0.010 |
| 7500-8500   | 1.047 | 0.073 | 0.078 | 0     | 0     |
| 8000-9000   | 1.010 | 0     | 0     | 0     | 0.037 |
| 8500-9500   | 0     | 0     | 0     | 0     | 0     |
| 9000-10000  | 0     | 0     | 0.050 | 0     | 0     |
| 9500-10500  | 2.000 | 0     | 1.000 | 0     | 0     |
| 10000-11000 | 2.000 | 0     | 1.000 | 0     | 0     |
| 10500-11500 | 0     | 0     | 0.057 | 0     | 0.002 |
| 11000-12000 | 0     | 0.073 | 0     | 0.005 | 0.003 |
| 11500-12500 | 0     | 0     | 0     | 0     | 0     |
| 13000-14000 | 1.000 | 0     | 0     | 0     | 0     |
| 13500-14500 | 1.000 | 0     | 0     | 0     | 0     |
| 14000-15000 | 0     | 0.002 | 0     | 0     | 0     |
| 14500-15500 | 0     | 0     | 0     | 0     | 0     |
| 15000-16000 | 0     | 0     | 0     | 0     | 0     |
| 15500-16500 | 0     | 0     | 0.034 | 0     | 0     |
| 16000-17000 | 0     | 0     | 0     | 1.001 | 0.001 |
| 16500-17500 | 0     | 0     | 0.043 | 0.936 | 0     |
| 17000-18000 | 0     | 0     | 0     | 0     | 0     |
| Average     | 0.252 | 0.006 | 0.109 | 0.061 | 0.004 |
| SD          | 0.570 | 0.018 | 0.301 | 0.238 | 0.009 |

Table S4: Potential donors for training host G3817 whose donor identified with contact tracing is G3729. Link intensities and ranks were obtained by cross-validation.

| Recipient | Donor | Link intensity | Rank |
|-----------|-------|----------------|------|
| G3817     | EM111 | 0.0409         | 1    |
|           | G3713 | 0.0398         | 2    |
|           | G3788 | 0.0393         | 3    |
|           | G3724 | 0.0391         | 4    |
|           | EM113 | 0.0273         | 5    |
|           | EM115 | 0.0266         | 6    |
|           | G3735 | 0.0257         | 7    |
|           | G3771 | 0.0257         | 7    |
|           | G3809 | 0.0257         | 7    |
|           | EM112 | 0.0250         | 10   |
|           | EM110 | 0.0248         | 11   |
|           | G3816 | 0.0248         | 12   |
|           | G3821 | 0.0248         | 12   |
|           | EM106 | 0.0247         | 14   |
|           | EM124 | 0.0246         | 15   |
|           | EM119 | 0.0242         | 16   |
|           | G3707 | 0.0238         | 17   |
|           | EM104 | 0.0237         | 18   |
|           | NM042 | 0.0237         | 18   |
|           | G3752 | 0.0237         | 20   |
|           | G3729 | 0.0237         | 21   |
|           | G3820 | 0.0232         | 22   |
|           | G3750 | 0.0225         | 23   |
|           | G3734 | 0.0218         | 24   |
|           | EM096 | 0.0215         | 25   |
|           | G3677 | 0.0214         | 26   |
|           | G3758 | 0.0213         | 27   |
|           | G3770 | 0.0212         | 28   |
|           | G3787 | 0.0208         | 29   |
|           | G3679 | 0.0206         | 30   |
|           | G3818 | 0.0203         | 31   |
|           | EM121 | 0.0202         | 32   |
|           | G3682 | 0.0200         | 33   |
|           | EM120 | 0.0189         | 34   |
|           | G3823 | 0.0185         | 35   |
|           | G3800 | 0.0180         | 36   |
|           | G3769 | 0.0178         | 37   |
|           | G3676 | 0.0173         | 38   |
|           | G3683 | 0.0169         | 39   |
|           | G3670 | 0.0162         | 40   |
|           | G3680 | 0.0151         | 41   |
|           | G3686 | 0.0142         | 42   |
|           | G3805 | 0.0074         | 43   |
|           | G3789 | 0.0033         | 44   |

Table S5: Potential donors for training host G3820 whose donor identified with contact tracing is G3729. Link intensities and ranks were obtained by cross-validation.

| Recipient | Donor | Link intensity | Rank |
|-----------|-------|----------------|------|
| G3820     | G3676 | 0.0525         | 1    |
|           | G3729 | 0.0277         | 2    |
|           | G3677 | 0.0270         | 3    |
|           | EM121 | 0.0269         | 4    |
|           | EM113 | 0.0269         | 5    |
|           | G3734 | 0.0268         | 6    |
|           | G3707 | 0.0267         | 7    |
|           | EM096 | 0.0263         | 8    |
|           | G3679 | 0.0254         | 9    |
|           | G3788 | 0.0249         | 10   |
|           | G3724 | 0.0244         | 11   |
|           | EM115 | 0.0244         | 12   |
|           | G3682 | 0.0239         | 13   |
|           | G3735 | 0.0238         | 14   |
|           | G3771 | 0.0238         | 14   |
|           | G3809 | 0.0238         | 14   |
|           | G3758 | 0.0238         | 17   |
|           | G3823 | 0.0236         | 18   |
|           | EM120 | 0.0231         | 19   |
|           | G3787 | 0.0229         | 20   |
|           | EM110 | 0.0229         | 21   |
|           | G3750 | 0.0229         | 22   |
|           | G3816 | 0.0229         | 22   |
|           | G3821 | 0.0229         | 22   |
|           | EM106 | 0.0227         | 25   |
|           | G3713 | 0.0226         | 26   |
|           | EM104 | 0.0223         | 27   |
|           | G3769 | 0.0223         | 28   |
|           | EM112 | 0.0220         | 29   |
|           | NM042 | 0.0219         | 30   |
|           | G3800 | 0.0218         | 31   |
|           | EM124 | 0.0216         | 32   |
|           | EM119 | 0.0215         | 33   |
|           | EM111 | 0.0211         | 34   |
|           | G3752 | 0.0205         | 35   |
|           | G3683 | 0.0204         | 36   |
|           | G3818 | 0.0192         | 37   |
|           | G3770 | 0.0191         | 38   |
|           | G3680 | 0.0188         | 39   |
|           | G3817 | 0.0179         | 40   |
|           | G3686 | 0.0178         | 41   |
|           | G3670 | 0.0170         | 42   |
|           | G3805 | 0.0057         | 43   |
|           | G3789 | 0.0033         | 44   |

Table S6: Potential donors for training host G3821 whose donor identified with contact tracing is G3729. Link intensities and ranks were obtained by cross-validation.

| Recipient | Donor | Link intensity | Rank |
|-----------|-------|----------------|------|
| G3821     | G3816 | 0.0556         | 1    |
|           | G3729 | 0.0513         | 2    |
|           | EM104 | 0.0391         | 3    |
|           | G3771 | 0.0344         | 4    |
|           | EM106 | 0.0338         | 5    |
|           | G3752 | 0.0305         | 6    |
|           | G3788 | 0.0277         | 7    |
|           | G3787 | 0.0269         | 8    |
|           | EM096 | 0.0259         | 9    |
|           | G3734 | 0.0258         | 10   |
|           | EM113 | 0.0248         | 11   |
|           | G3735 | 0.0248         | 11   |
|           | EM115 | 0.0245         | 13   |
|           | EM111 | 0.0239         | 14   |
|           | EM112 | 0.0235         | 15   |
|           | G3670 | 0.0234         | 16   |
|           | G3809 | 0.0234         | 17   |
|           | G3683 | 0.0232         | 18   |
|           | EM110 | 0.0230         | 19   |
|           | EM124 | 0.0222         | 20   |
|           | G3707 | 0.0214         | 21   |
|           | G3770 | 0.0213         | 22   |
|           | G3724 | 0.0211         | 23   |
|           | G3713 | 0.0211         | 24   |
|           | G3818 | 0.0210         | 25   |
|           | EM119 | 0.0209         | 26   |
|           | EM121 | 0.0203         | 27   |
|           | G3677 | 0.0200         | 28   |
|           | G3758 | 0.0196         | 29   |
|           | NM042 | 0.0194         | 30   |
|           | G3820 | 0.0188         | 31   |
|           | EM120 | 0.0188         | 32   |
|           | G3750 | 0.0187         | 33   |
|           | G3682 | 0.0180         | 34   |
|           | G3679 | 0.0177         | 35   |
|           | G3817 | 0.0174         | 36   |
|           | G3823 | 0.0173         | 37   |
|           | G3769 | 0.0166         | 38   |
|           | G3800 | 0.0162         | 39   |
|           | G3676 | 0.0147         | 40   |
|           | G3680 | 0.0124         | 41   |
|           | G3686 | 0.0113         | 42   |
|           | G3805 | 0.0068         | 43   |
|           | G3789 | 0.0016         | 44   |

Table S7: Potential donors for training host G3823 whose donor identified with contact tracing is G3729. Link intensities and ranks were obtained by cross-validation.

| Recipient | Donor | Link intensity | Rank |
|-----------|-------|----------------|------|
| G3823     | G3682 | 0.0300         | 1    |
|           | EM106 | 0.0293         | 2    |
|           | G3769 | 0.0290         | 3    |
|           | EM104 | 0.0283         | 4    |
|           | G3677 | 0.0271         | 5    |
|           | EM113 | 0.0270         | 6    |
|           | G3820 | 0.0263         | 7    |
|           | EM121 | 0.0262         | 8    |
|           | G3683 | 0.0256         | 9    |
|           | G3735 | 0.0254         | 10   |
|           | G3771 | 0.0254         | 10   |
|           | EM096 | 0.0253         | 12   |
|           | G3707 | 0.0253         | 13   |
|           | G3729 | 0.0247         | 14   |
|           | EM115 | 0.0245         | 15   |
|           | G3724 | 0.0245         | 15   |
|           | G3758 | 0.0244         | 17   |
|           | G3788 | 0.0244         | 18   |
|           | G3679 | 0.0244         | 19   |
|           | G3821 | 0.0244         | 19   |
|           | G3734 | 0.0244         | 21   |
|           | EM120 | 0.0243         | 22   |
|           | G3787 | 0.0238         | 23   |
|           | G3809 | 0.0238         | 24   |
|           | EM112 | 0.0236         | 25   |
|           | EM110 | 0.0236         | 26   |
|           | EM124 | 0.0235         | 27   |
|           | G3750 | 0.0229         | 28   |
|           | G3816 | 0.0228         | 29   |
|           | G3800 | 0.0224         | 30   |
|           | G3713 | 0.0219         | 31   |
|           | EM111 | 0.0212         | 32   |
|           | NM042 | 0.0210         | 33   |
|           | G3818 | 0.0200         | 34   |
|           | G3676 | 0.0197         | 35   |
|           | G3752 | 0.0196         | 36   |
|           | EM119 | 0.0195         | 37   |
|           | G3770 | 0.0192         | 38   |
|           | G3817 | 0.0184         | 39   |
|           | G3680 | 0.0181         | 40   |
|           | G3670 | 0.0179         | 41   |
|           | G3686 | 0.0166         | 42   |
|           | G3805 | 0.0067         | 43   |
|           | G3789 | 0.0033         | 44   |

Table S8: Potential donors for training host G3851 whose donor identified with contact tracing is G3752. Link intensities and ranks were obtained by cross-validation.

| Recipient | Donor | Link intensity | Rank | Donor | Link intensity | Rank |
|-----------|-------|----------------|------|-------|----------------|------|
| G3851     | G3769 | 0.0438         | 1    | G3800 | 0.0139         | 45   |
|           | G3825 | 0.0430         | 2    | G3838 | 0.0135         | 46   |
|           | G3724 | 0.0326         | 3    | G3670 | 0.0132         | 47   |
|           | EM106 | 0.0274         | 4    | G3682 | 0.0131         | 48   |
|           | G3771 | 0.0264         | 5    | EM120 | 0.0128         | 49   |
|           | G3829 | 0.0262         | 6    | G3817 | 0.0127         | 50   |
|           | EM104 | 0.0255         | 7    | G3683 | 0.0119         | 51   |
|           | G3821 | 0.0250         | 8    | G3823 | 0.0118         | 52   |
|           | G3752 | 0.0244         | 9    | G3676 | 0.0112         | 53   |
|           | G3850 | 0.0211         | 10   | G3680 | 0.0105         | 54   |
|           | EM113 | 0.0208         | 11   | G3686 | 0.0098         | 55   |
|           | G3848 | 0.0208         | 11   | G3805 | 0.0057         | 56   |
|           | EM115 | 0.0206         | 13   | G3789 | 0.0025         | 57   |
|           | G3826 | 0.0200         | 14   |       |                |      |
|           | G3856 | 0.0198         | 15   |       |                |      |
|           | EM111 | 0.0187         | 16   |       |                |      |
|           | G3735 | 0.0177         | 17   |       |                |      |
|           | G3809 | 0.0177         | 17   |       |                |      |
|           | G3840 | 0.0177         | 17   |       |                |      |
|           | G3788 | 0.0175         | 20   |       |                |      |
|           | EM110 | 0.0170         | 21   |       |                |      |
|           | G3816 | 0.0170         | 22   |       |                |      |
|           | NM042 | 0.0169         | 23   |       |                |      |
|           | EM112 | 0.0168         | 24   |       |                |      |
|           | G3845 | 0.0168         | 25   |       |                |      |
|           | G3677 | 0.0165         | 26   |       |                |      |
|           | G3707 | 0.0163         | 27   |       |                |      |
|           | EM124 | 0.0161         | 28   |       |                |      |
|           | G3713 | 0.0161         | 29   |       |                |      |
|           | G3729 | 0.0159         | 30   |       |                |      |
|           | G3787 | 0.0158         | 31   |       |                |      |
|           | G3820 | 0.0156         | 32   |       |                |      |
|           | EM119 | 0.0155         | 33   |       |                |      |
|           | G3841 | 0.0147         | 34   |       |                |      |
|           | G3734 | 0.0146         | 35   |       |                |      |
|           | G3770 | 0.0146         | 36   |       |                |      |
|           | EM096 | 0.0145         | 37   |       |                |      |
|           | G3679 | 0.0145         | 37   |       |                |      |
|           | G3750 | 0.0145         | 39   |       |                |      |
|           | G3758 | 0.0144         | 40   |       |                |      |
|           | G3846 | 0.0144         | 41   |       |                |      |
|           | G3831 | 0.0143         | 42   |       |                |      |
|           | EM121 | 0.0142         | 43   |       |                |      |
|           | G3818 | 0.0140         | 44   |       |                |      |



Table S9: Specification of the components of the inference procedure. Note that setting  $\Delta_{ij}$  at the value 1 implies that the substitution parameter  $\mu$  corresponds, for each inferred transmission, to the expected number of substitutions per nucleotide in the evolutionary duration separating the two samples.

| Model component                                                      | Influenza                                                                                         | Ebola                                                                                                                     | Potyvirus                            |
|----------------------------------------------------------------------|---------------------------------------------------------------------------------------------------|---------------------------------------------------------------------------------------------------------------------------|--------------------------------------|
| Duration $\Delta_{ij}$                                               | $\Delta_{ij} \equiv 1$                                                                            | $\Delta_{ij} \equiv 1$                                                                                                    | $\Delta_{ij} \equiv 1$               |
| Shape for $P_\theta$                                                 | H1-Normal<br>(eq. (4.3))                                                                          | H2-normal (eq. (4.5))<br>$(\bar{d}_{\text{obs}}, \sigma_{\text{obs}}^2)$ estimated from<br>training donor–recipient pairs | H1-Chi-squared<br>(eq. (4.4))        |
| Set $\Theta$ of values for<br>the penalisation<br>parameter $\theta$ | Naive chain:<br>$\{0, 0.1, 0.2, \dots, 4\}$<br>Vaccinated chain:<br>$\{0, 0.25, 0.5, \dots, 10\}$ | $\{0, 10, 20, \dots, 200\}$                                                                                               | $\{0, 1, 2, \dots, 40\}$             |
| Basis for the<br>calibration of $\theta$                             | Contact tracing<br>(eq. (4.4))                                                                    | Contact tracing<br>(eq. (4.6))                                                                                            | Geographical distance<br>(eq. (4.7)) |

Table S10: Discrepancy between inferred transmission graphs and reference graphs measured by the proportion of correct source identifications (CSI) and the Jeffreys discrepancy (JD) averaged over all hosts. For the Influenza case studies, the reference graph is the graph where the source for the hosts in the first group is an external source with probability 1, and the source for the hosts in the subsequent groups is any host in the preceding group with probability 0.5 (when the preceding group consists of 2 hosts) or probability 1 (when the preceding group consists of a single host; this occurs once in the vaccinated chain). For the Ebola case study, the reference is the graph obtained with BadTrIP by De Maio et al. (2018); in this case, the criteria were computed from recipient hosts that were in both analyses (BadTrIP and SLAFEEL). The proportion of CSI is computed as the proportion of hosts whose most likely source (based on the inferred graph) coincides with (one of) its source(s) in the reference graph (for the Ebola case study, the sources in the reference graph are only the most likely sources provided by BadTrIP; see Figure S14 for a less conservative definition). The JD (Chung et al., 1989; Jeffreys, 1946) measures the distance between two finite discrete probability distributions, say  $\mathbf{p} = (p_1, \dots, p_n)$  and  $\mathbf{q} = (q_1, \dots, q_n)$ , by the quantity  $\sum_{i=1}^n (\sqrt{p_i} - \sqrt{q_i})^2$ . In our applications,  $\mathbf{p}$  gives for a given recipient host the estimated probability for any other host to be its donor, and  $\mathbf{q}$  gives for the same recipient host the reference vector of probabilities built as described above. For each inferred transmission graph, the JD was computed for all observed recipient hosts and, then, averaged.

| Case study                          | Method            | Penal. | Training hosts        | Figure  | Prop. CSI | Mean JD | SE JD |
|-------------------------------------|-------------------|--------|-----------------------|---------|-----------|---------|-------|
| Swine Influenza<br>Naive chain      | SLAFEEL           | Yes    | 106, 112              | 1 (A)   | 0.60      | 0.84    | 0.19  |
|                                     | SLAFEEL           | Yes    | 111, 108              | 1 (B)   | 0.60      | 0.78    | 0.14  |
|                                     | SLAFEEL           | No     | –                     | S3 (A)  | 0.20      | 1.48    | 0.18  |
|                                     | BadTrIP*          | –      | –                     | S12 (A) | 0.30      | 0.90    | 0.14  |
| Swine Influenza<br>Vaccinated chain | SLAFEEL           | Yes    | 400, 413              | 1 (C)   | 0.42      | 0.86    | 0.19  |
|                                     | SLAFEEL           | Yes    | 401, 416              | 1 (D)   | 0.42      | 0.90    | 0.24  |
|                                     | SLAFEEL           | Yes    | 400, 413, 401         | S1 (A)  | 0.50      | 1.02    | 0.25  |
|                                     | SLAFEEL           | Yes    | 400, 413, 415         | S1 (B)  | 0.50      | 1.01    | 0.26  |
|                                     | SLAFEEL           | Yes    | 400, 413, 416         | S1 (C)  | 0.42      | 1.11    | 0.27  |
|                                     | SLAFEEL           | Yes    | 401, 415, 416         | S1 (D)  | 0.42      | 0.90    | 0.24  |
|                                     | SLAFEEL           | No     | –                     | S3 (B)  | 0.42      | 0.92    | 0.22  |
|                                     | BadTrIP*          | –      | –                     | S12 (B) | 0.33      | 0.99    | 0.22  |
| Ebola                               | SLAFEEL           | Yes    | G3817, G3829          | 3       | 0.08      | 0.80    | 0.04  |
|                                     | <i>vs</i> BadTrIP |        | G3821, G3823<br>G3851 |         |           |         |       |

\*To fairly compare BadTrIP and SLAFEEL in the Influenza case studies, we *a posteriori* pruned impossible transmissions inferred by BadTrIP based on temporal information (as we *a priori* did with SLAFEEL), we reweighted the remaining inferred transmissions such that their probabilities sum to 1 for each infected host, and we computed the CSI, the mean JD and the SD of JD from the remaining transmissions and their updated probabilities.

A

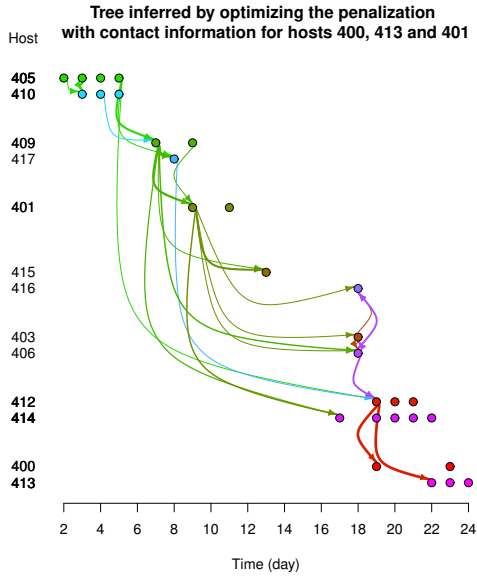

B

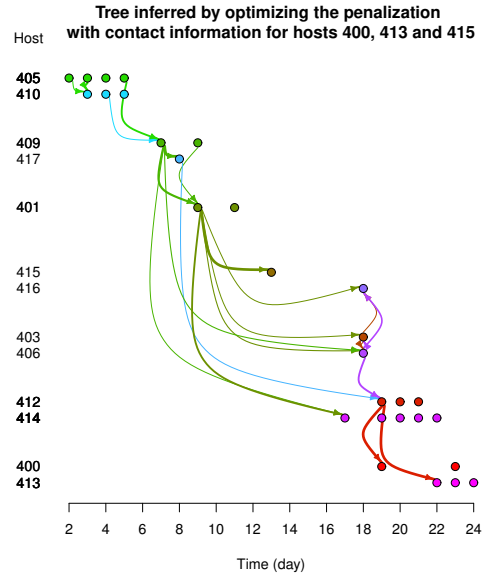

C

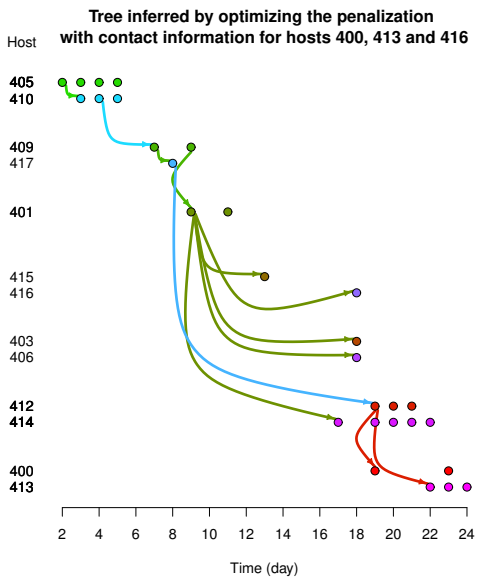

D

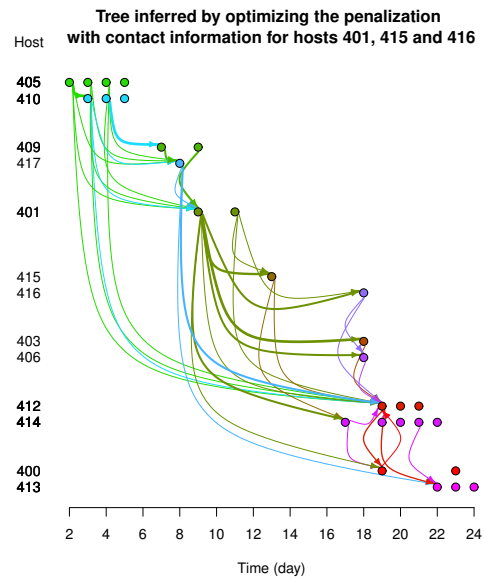

Figure S1: Transmissions inferred in the vaccinated chain with different sets of three training hosts for calibrating the penalisation. The thickness of each arrow is proportional to the intensity of the corresponding link.

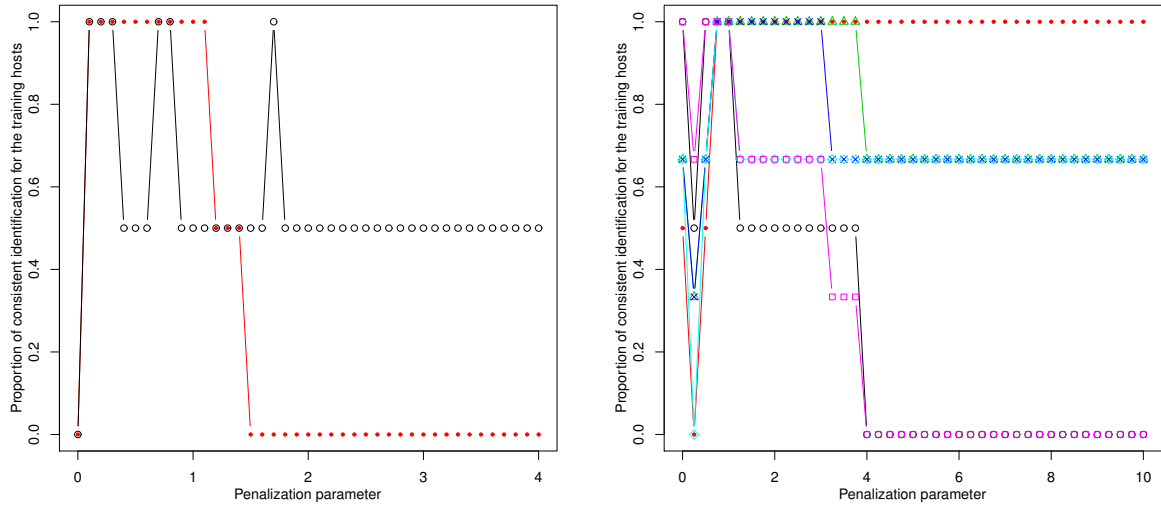

Figure S2: Proportion of source identifications that are consistent with contact information about the training hosts for the naive chain (left) and the vaccinated chain (right), as a function of the penalisation parameter. In each panel, the rate of consistent identifications is shown in red when the training hosts are the two pigs of the last group of the outbreak, and in black when the training hosts are two pigs selected from the 3rd and 4th groups of the outbreak; see details in Table 1 of the main text. In the right panel, the green curve corresponds to training hosts 400, 413 and 401; the dark blue curve to 400, 413 and 415, the light blue curve to 400, 413 and 416 and the pink curve to 401, 415 and 416. Adding a third host to training data allows us to reduce the range of optimal penalisation parameters.

A

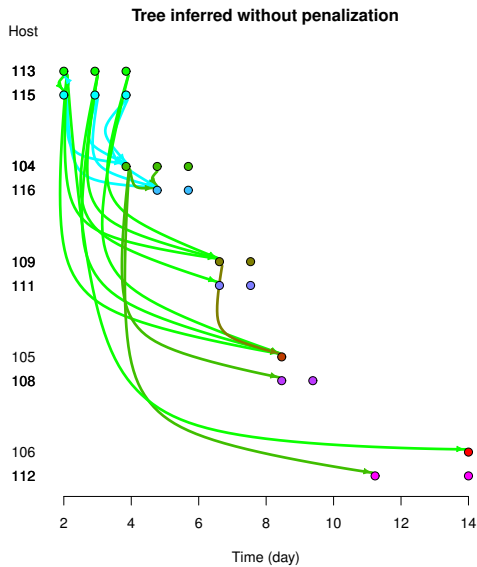

B

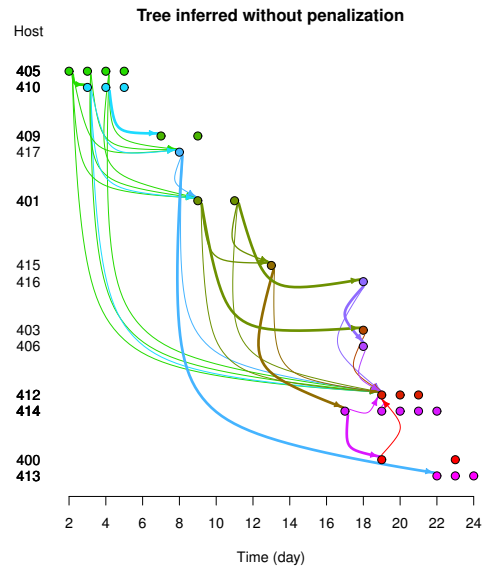

Figure S3: Transmissions inferred in the naive chain (left) and vaccinated chain (right) without including the penalisation and, therefore, without including training hosts.

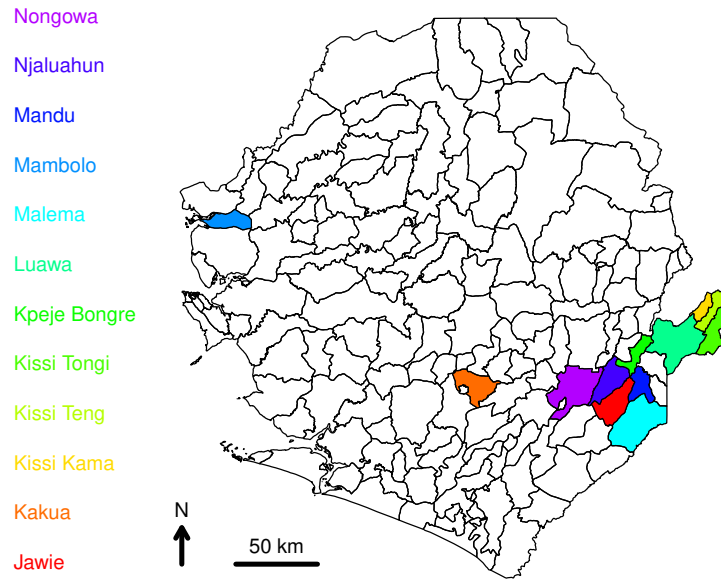

Figure S4: Map of Sierra Leone showing the locations of chiefdoms included in the analysis of Ebola data.

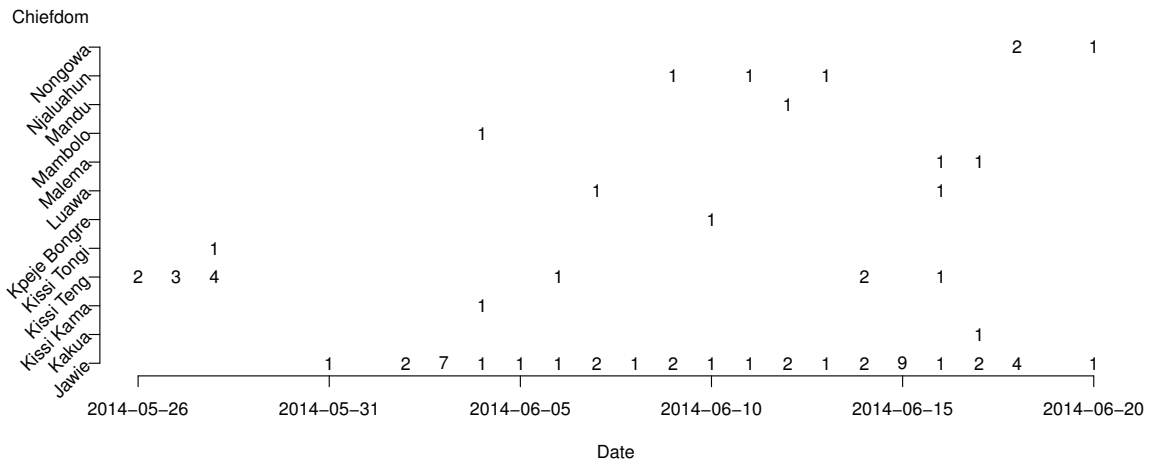

Figure S5: Number of Ebola patients included in the analysis as a function of collection date and chiefdom.

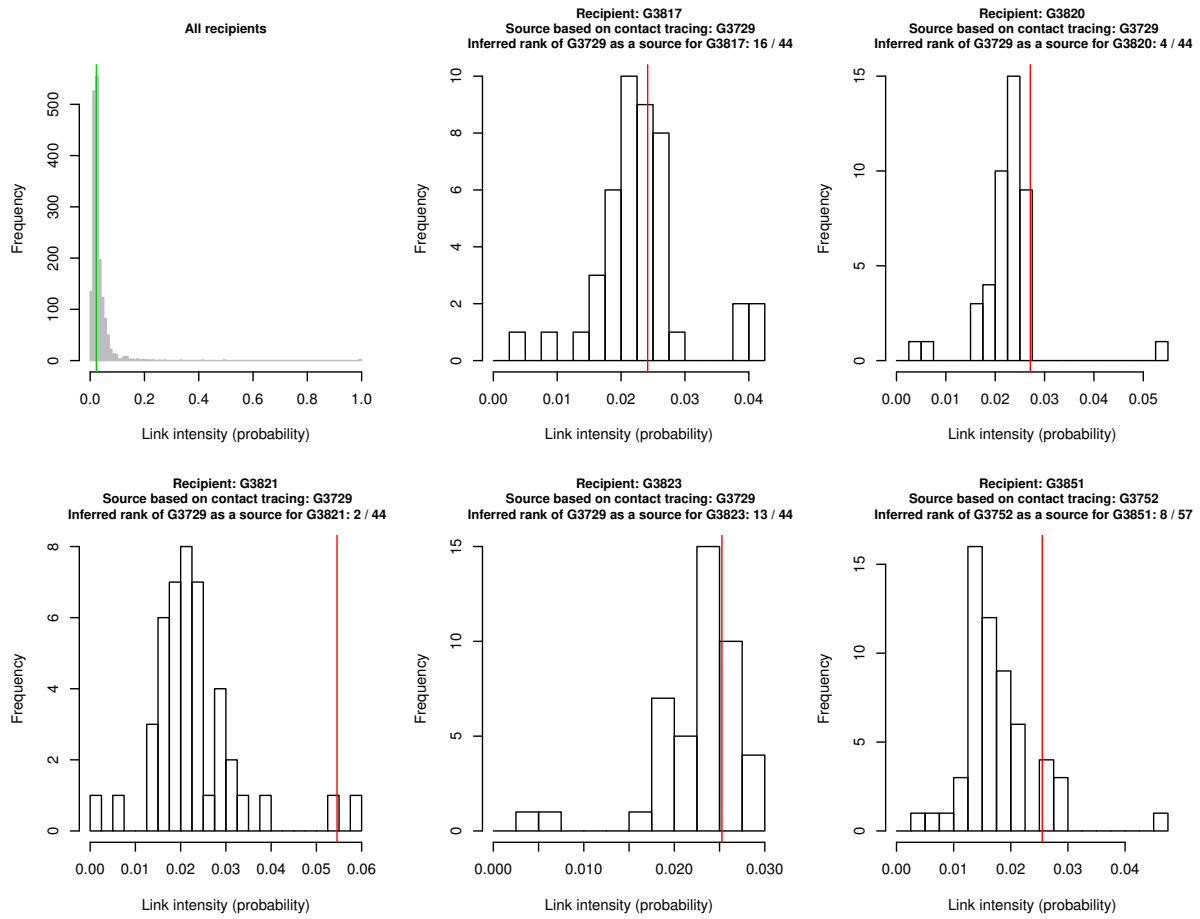

Figure S6: Estimated intensities of links in the Ebola dataset for all recipients (top left panel; green line: median intensity) and for each recipient in the training set of hosts (other panels; red line: intensity for the source identified with contact tracing). This figure was obtained from the combined analysis of 31 sequence fragments and without cross-validation.

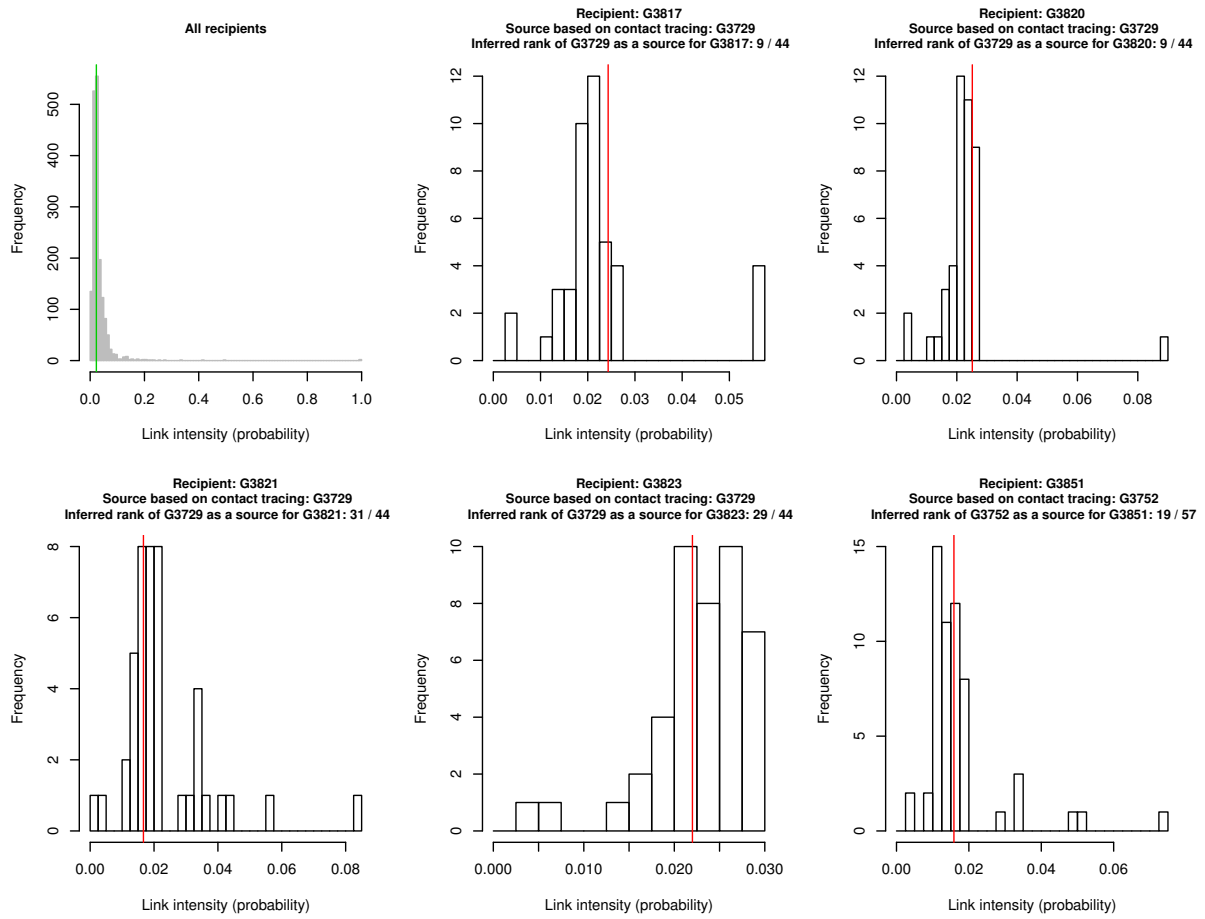

Figure S7: Estimated intensities of links for all recipients (top left panel; green line: median intensity) and for each recipient in the training set of hosts (other panels; red line: intensity for the source identified with contact tracing). This figure was obtained from the combined analysis of 15 sequence fragments from sequence site 500 to sequence site 9000, and with cross-validation.

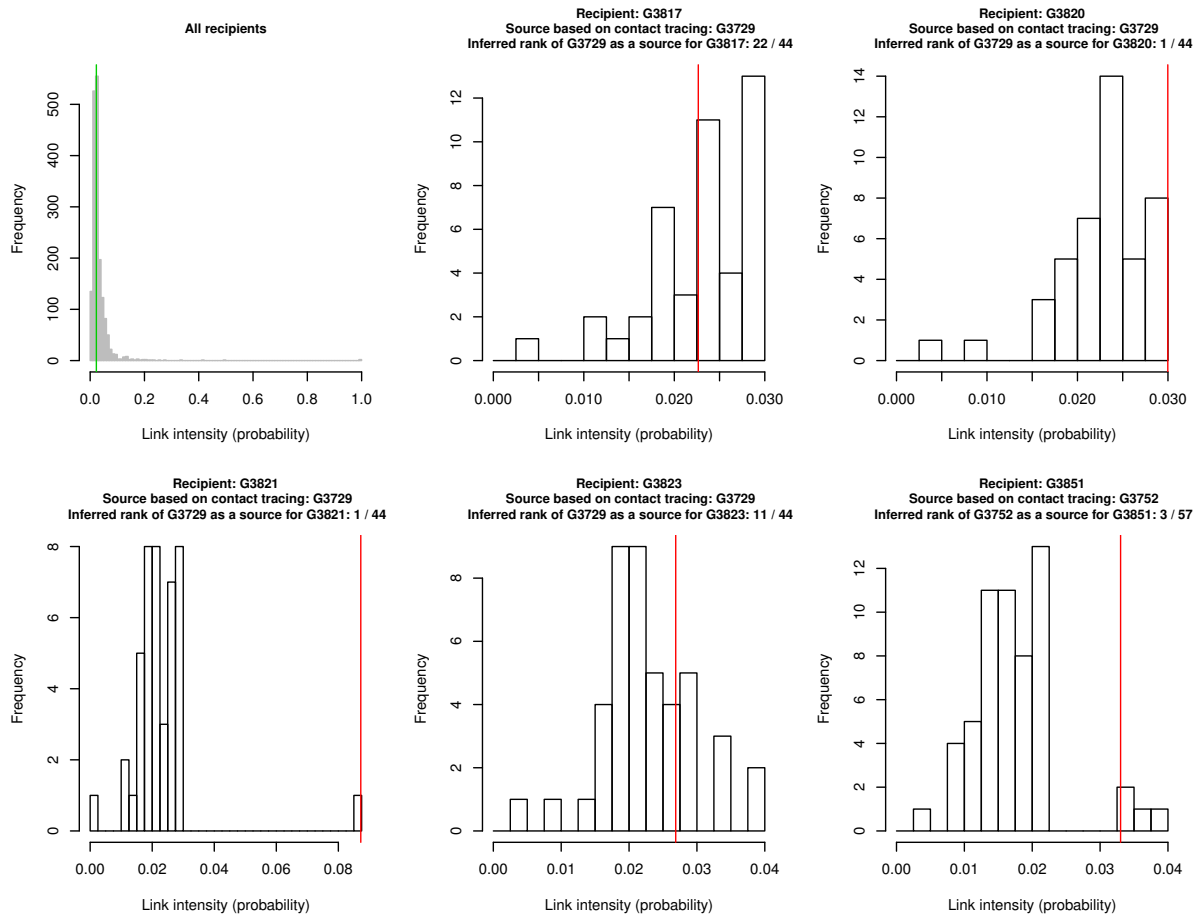

Figure S8: Estimated intensities of links for all recipients (top left panel; green line: median intensity) and for each recipient in the training set of hosts (other panels; red line: intensity for the source identified with contact tracing). This figure was obtained from the combined analysis of 15 sequence fragments from sequence site 9000 to sequence site 18000, and with cross-validation.



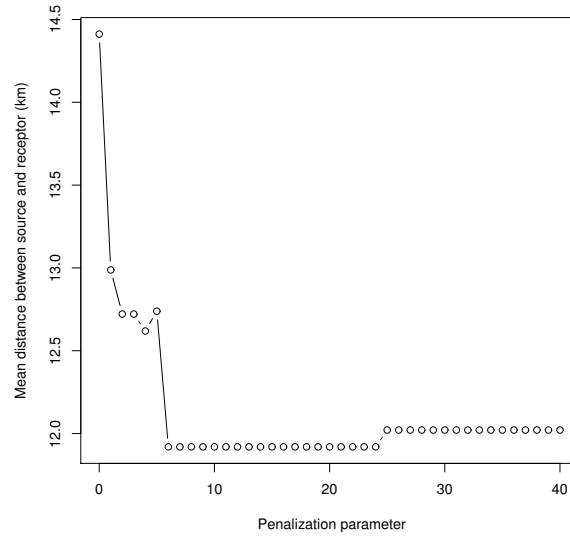

Figure S9: Mean distance between connected salsify patches with respect to the penalisation parameter.

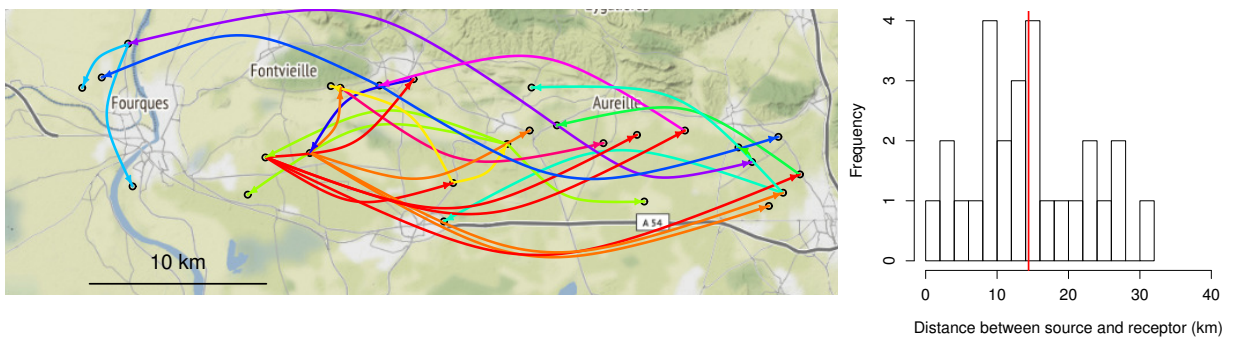

Figure S10: Links inferred without penalisation between salsify populations based on sampled sets of potyvirus sequences (left; links from the same source have the same color) and distribution of link distances (right; the vertical red line indicates the mean distance).

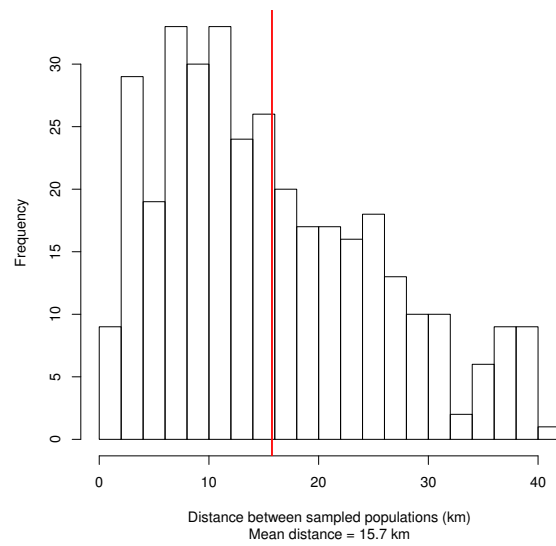

Figure S11: Distribution of distances between salsify patches. The vertical red line indicates the mean distance.

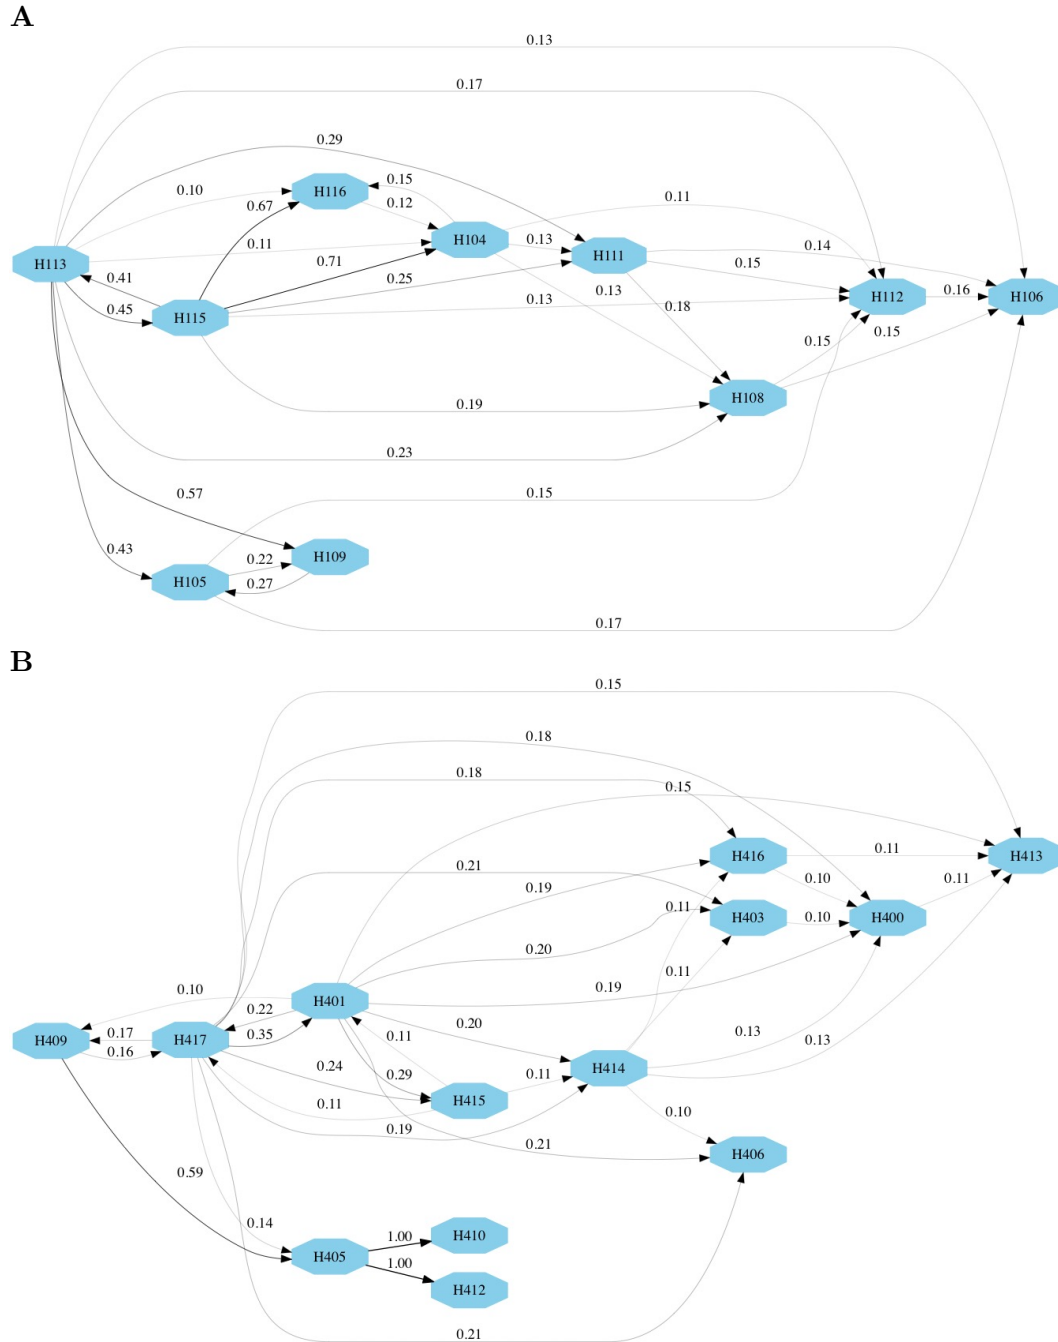

Figure S12: Inference of transmissions in the naive (A) and vaccinated (B) Swine influenza transmission chains. Transmission events with posterior probability higher than 0.10 as inferred by BadTrIP are shown. Hexagons represent hosts, while arrows are transmission events between hosts. The posterior probability of transmissions are shown next to the arrows and higher values are shown with thicker arrows. — For both datasets, the sequences for each sample were re-coded for use in the BadTrIP package (De Maio et al., 2018) embedded in BEAST2 (Bouckaert et al., 2014). BadTrIP uses the PoMo model (De Maio et al., 2015) that describes how a population evolves along the branches of a population tree. We allowed each host in the Swine influenza transmission chain to be infectious for the whole period of the experiment. We ran the BadTrIP MCMC for approximately 4 million independent steps, which provided an effective sample size of 20 and took one week of computation (on one CPU of an iMac 4 GHZ Intel Core i7).

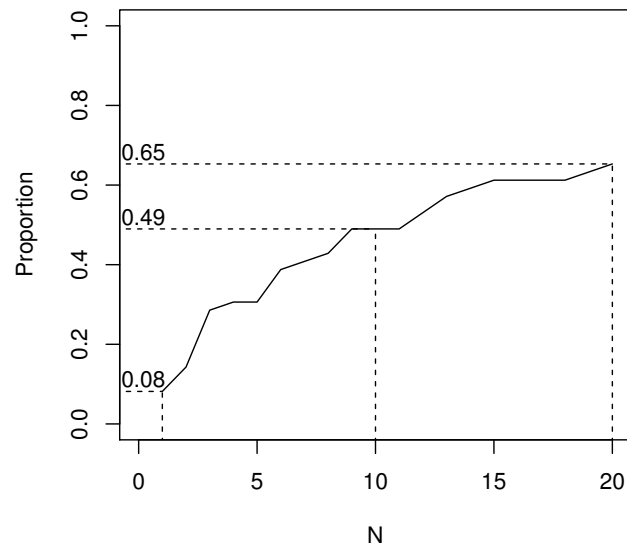

Figure S13: Proportion of recipient hosts whose SLAFEEEL-based most likely sources are among the N BadTriP-based most likely sources. The proportion obtained when  $N=1$  corresponds to the proportion of correct source identifications (CSI) provided in Table S10.

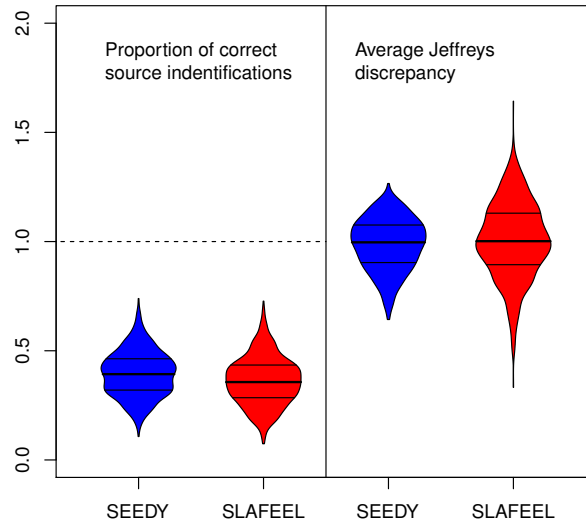

Figure S14: Comparison between SLAFEEL and SEEDY (Worby and Read, 2015) in their ability to identify transmission trees simulated with SEEDY. The comparison was made by assessing the discrepancy between inferred transmission graphs and the simulated graphs, using two criteria: the proportion of correct source identifications and the average Jeffreys discrepancy (see their definitions in table S10). These criteria were computed for 1000 data sets generated with SEEDY by using parameter values chosen by Worby and Read to generate their 4th figure (see details below). The mean epidemic size of simulated outbreaks was: 26.6 infected hosts (SD=2.3). For the application of SLAFEEL to each simulated outbreak, we randomly drew 4 training hosts whose sources were supposed to be known, we chose the H1-normal penalisation, we set  $\Delta_{ij} \equiv 1$  and  $\Theta = \{0, 1, 2, \dots, 10\}$ . — Outbreaks were simulated with the following parameter values. Number of susceptibles in population: 30. Rate of infection: 0.02. Rate of removal/recovery: 0.001. Mutation rate per sequence per generation: 0.001. Equilibrium population size within host: 1000. Transmission bottleneck size: 10. Samples taken per time point: 10 (1 time point per host, randomly and uniformly drawn between 1 and 300 time steps after host infection). Minimum number of cases before returning (retries until fulfilled): 20. Genome length:  $10^5$ .

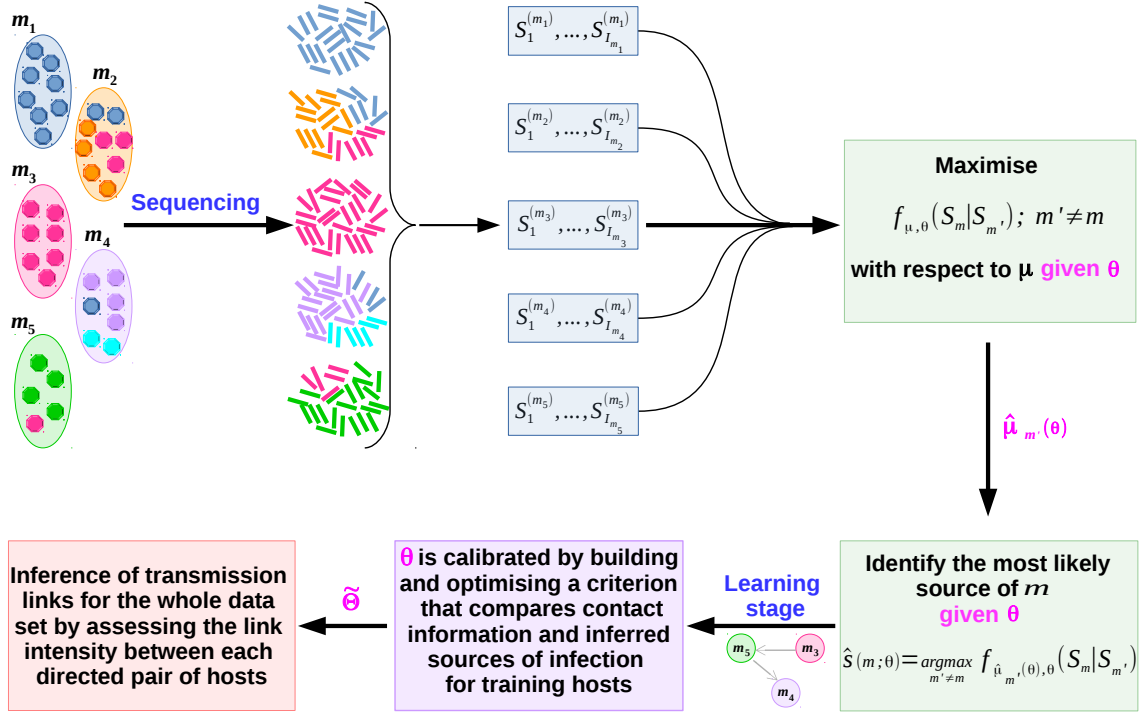

Figure S15: Graphical representation of SLAFEEL. Virus sequences are collected from several hosts  $m_1, m_2, \dots$ . In a first step, the penalised pseudo-likelihood  $f_{\mu, \theta}(\mathbf{S}_m | \mathbf{S}'_m)$  is maximised for each possible donor–recipient pair  $(m', m)$  and a set of values for the penalisation parameter  $\theta$ . This maximisation provides an estimate  $\hat{\mu}_{m'}(\theta)$  of the evolutionary parameter  $\mu$  given  $\theta$  and the putative source  $m'$ . Then, given  $\theta$ , the most likely source of the recipient  $m$ , say  $s(m; \theta)$ , is identified by maximising  $f_{\hat{\mu}_{m'}(\theta), \theta}(\mathbf{S}_m | \mathbf{S}'_m)$  with respect to  $m'$ . In a second step, by using contact information about training hosts (e.g.,  $m_3$  possibly infected  $m_5$  and  $m_5$  possibly infected  $m_4$ ), the penalization parameter  $\theta$  is calibrated with a learning approach by building and optimising a criterion that compares contact information and sources of infection  $\hat{s}(m_4; \theta)$  and  $\hat{s}(m_5; \theta)$  inferred for training hosts  $m_4$  and  $m_5$ , respectively.  $\tilde{\Theta}$  is the set of penalisation values for which the criterion is optimal. In a third step, the link intensity is used to assess the likelihood of the link between a donor and a recipient.

## References

- Bouckaert, R., J. Heled, D. Kühnert, T. Vaughan, C.-H. Wu, D. Xie, M. A. Suchard, A. Rambaut, and A. J. Drummond (2014). BEAST 2: A software platform for Bayesian evolutionary analysis. *PLoS Computational Biology* 10, e1003537.
- Chung, J. K., P. L. Kannappan, C. T. Ng, and P. K. Sahoo (1989). Measures of distance between probability distributions. *Journal of Mathematical Analysis and Applications* 138, 280–292.
- De Maio, N., D. Schrempf, and C. Kosiol (2015). PoMo: An allele frequency-based approach for species tree estimation. *Systematic Biology* 64, 1018–1031.
- De Maio, N., C. J. Worby, D. J. Wilson, and N. Stoesser (2018). Bayesian reconstruction of transmission within outbreaks using genomic variants. *PLoS Computational Biology* 14, e1006117.
- Jeffreys, H. (1946). An invariant form for the prior probability in estimation problems. *Proceedings of the Royal Society of London A* 186, 453–461.
- Worby, C. J. and T. D. Read (2015). 'SEEDY'(simulation of evolutionary and epidemiological dynamics): An R package to follow accumulation of within-host mutation in pathogens. *PLoS One* 10(6), e0129745.
